# Supplementary material
Source: PubMed Central journal article supplement (PMC7747203)
Supplement: 40820_2018_210_MOESM1_ESM.pdf [file 40820_2018_210_MOESM1_ESM.pdf]

Supporting Information for

## Hybrid Field-Effect Transistors and Photodetectors Based on Organic Semiconductor and CsPbI<sub>3</sub> Perovskite Nanorods Bilayer Structure

Yantao Chen<sup>2</sup>, Xiaohan Wu<sup>2</sup>, Yingli Chu<sup>2</sup>, Jiachen Zhou<sup>2</sup>, Bilei Zhou<sup>2</sup>, Jia Huang<sup>1, 2, \*</sup>

<sup>1</sup>Key Laboratory of Road and Traffic Engineering of Ministry of Education, Tongji University, Shanghai 201804, People's Republic of China

<sup>2</sup>Interdisciplinary Materials Research Center, School of Materials Science and Engineering, Tongji University, Shanghai 201804, People's Republic of China

\*Corresponding author. E-mail: huangjia@tongji.edu.cn (Jia Huang)

### Supplementary Figures

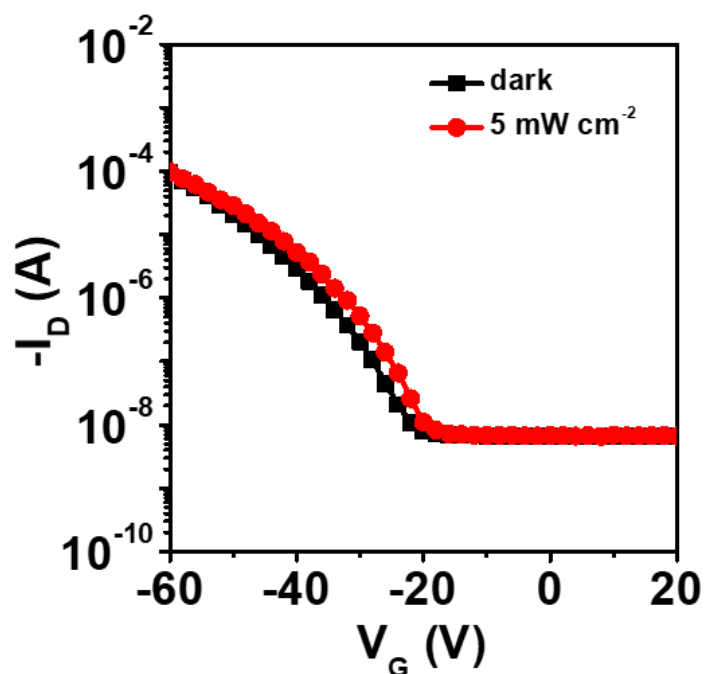

**Fig. S1** Photoresponse properties for transistors based on C8BTBT in the dark and under light illumination ( $10 \text{ mW cm}^{-2}$ ) at  $V_D = -30 \text{ V}$

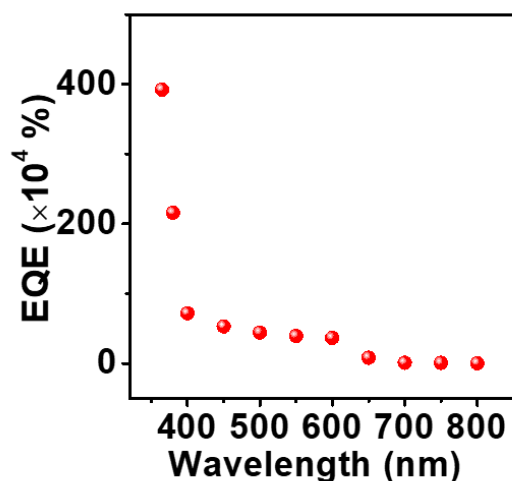

**Fig. S2** Calculated  $EQE$  of the hybrid phototransistors as a function of the illumination wavelength under  $0.5 \text{ mW cm}^{-2}$  at  $V_G = -60 \text{ V}$ ,  $V_D = -30 \text{ V}$

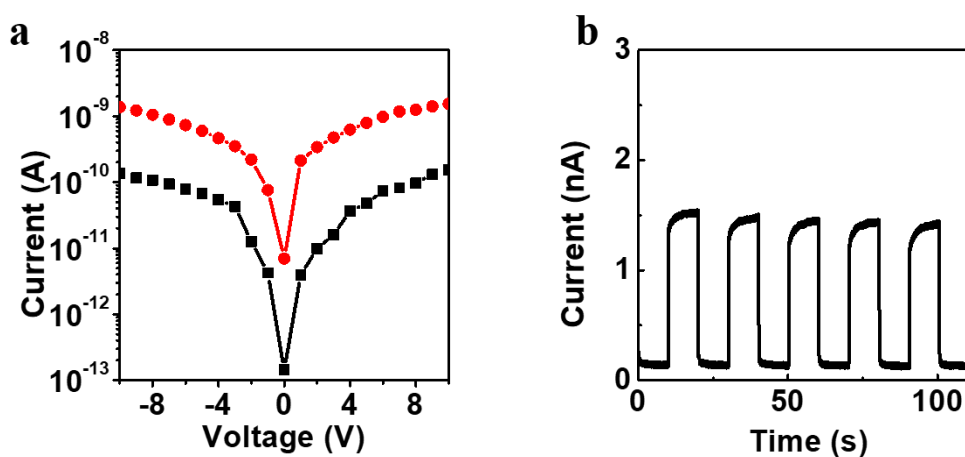

**Fig. S3** **a**  $I$ - $V$  curves of the only CsPbI<sub>3</sub> nanorods-based photodetectors measured in dark and under  $5 \text{ mW cm}^{-2}$ . **b** Time-dependent photoresponse of the only CsPbI<sub>3</sub> nanorods-based photodetectors measured in dark and under  $5 \text{ mW cm}^{-2}$  at  $10 \text{ V}$

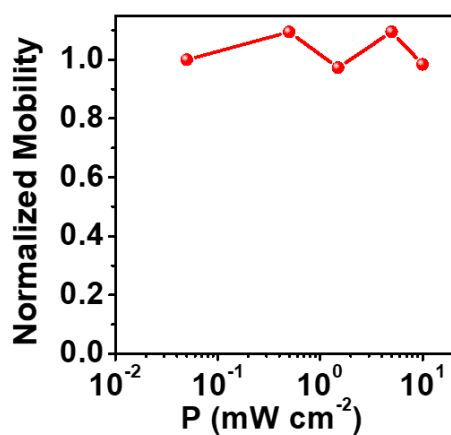

**Fig. S4** Normalized mobility of the hybrid phototransistors versus the power intensity at  $V_D = -30 \text{ V}$

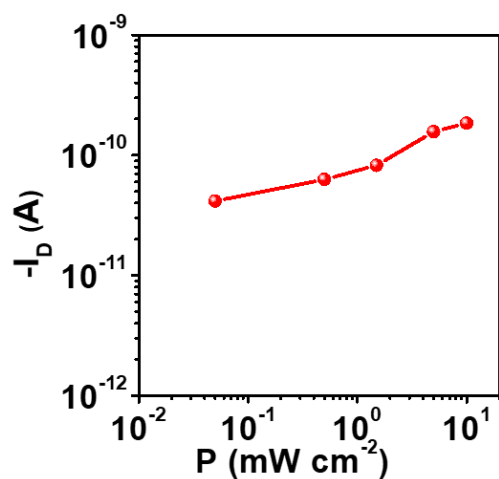

**Fig. S5** The output current in off-state of the hybrid phototransistor as a function of the power intensity at  $V_D = -30$  V

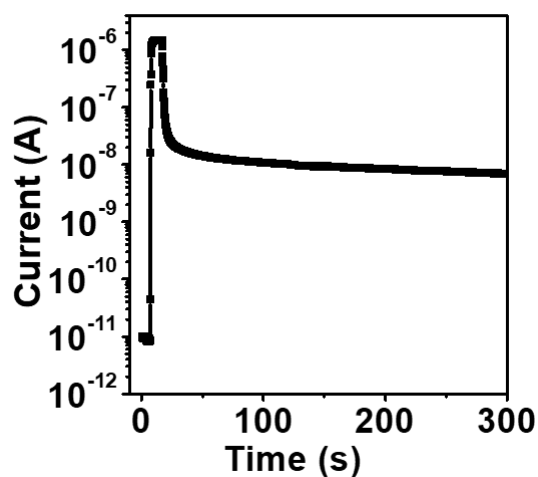

**Fig. S6** 10 s white light irradiation of the hybrid devices under  $0.5 \text{ mW cm}^{-2}$  followed by removal of light incident to allow relaxation for 5 min

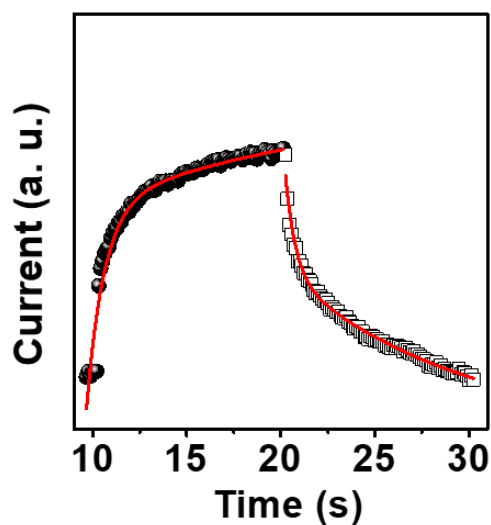

**Fig. S7** The photoresponse curves of the hybrid phototransistor and the fitted lines

**Table S1** Performance comparison of our C8BTBT/CsPbI<sub>3</sub> nanorods-based photodetectors with low-dimensional all inorganic perovskite-based photodetectors in literatures

| Material                          | Light source       | R(A W <sup>-1</sup> )       | I <sub>photo</sub> /I <sub>dark</sub> | Stability      | Ref.             |
|-----------------------------------|--------------------|-----------------------------|---------------------------------------|----------------|------------------|
| CsPbI <sub>3</sub> nanorods       | 405 nm             | 2.92 × 10 <sup>3</sup>      | 3 × 10 <sup>3</sup>                   | 1 week         | [1]              |
| CsPbI <sub>3</sub> nanoarrays     | N/A                | 0.0067                      | N/A                                   | N/A            | [2]              |
| CsPbI <sub>3</sub> nanowires      | White light        | N/A                         | 100                                   | 4 weeks        | [3]              |
| CsPbI <sub>3</sub> nanocrystals   | 405 nm             | N/A                         | 10 <sup>5</sup>                       | N/A            | [4]              |
| films                             |                    |                             |                                       |                |                  |
| CsPbI <sub>3</sub> QDs            | 525 nm             | 1.5                         | 10 <sup>4</sup>                       | 60 days        | [5]              |
| /NaYF <sub>4</sub> :Yb,Er QDs     |                    |                             |                                       |                |                  |
| CsPb(Br/I) <sub>3</sub> nanorods  | 532 nm             | N/A                         | 10 <sup>3</sup>                       | N/A            | [6]              |
| <b>CsPbI<sub>3</sub> nanorods</b> | <b>White light</b> | <b>5.3 × 10<sup>3</sup></b> | <b>2.2 × 10<sup>6</sup></b>           | <b>1 month</b> | <b>This work</b> |
| <b>/C8BTBT</b>                    |                    |                             |                                       |                |                  |

## Supplementary References

- [1] T. Yang, Y. Zheng, Z. Du, W. Liu, Z. Yang et al., Superior photodetectors based on all-inorganic perovskite CsPbI<sub>3</sub> nanorods with ultrafast response and high stability. *ACS Nano*. **12**(2), 1611-1617 (2018). <https://doi.org/10.1021/acsnano.7b08201>
- [2] A. Waleed, M.M. Tavakoli, L. Gu, S. Hussain, D. Zhang et al., All inorganic cesium lead iodide perovskite nanowires with stabilized cubic phase at room temperature and nanowire array-based photodetectors. *Nano Lett.* **17**(8), 4951-4957 (2017). <https://doi.org/10.1021/acs.nanolett.7b02101>
- [3] Lai M, Kong Q, Bischak CG, Yu Y, Dou L, Eaton SW, Ginsberg NS, Yang P. Structural, optical, and electrical properties of phase-controlled cesium lead iodide nanowires. *Nano Res.* **10**(4), 1107-1114 (2017). <https://doi.org/10.1007/s12274-016-1415-0>
- [4] P. Ramasamy, D.H. Lim, B. Kim, S.H. Lee, M.S. Lee, J.S. Lee, All-inorganic cesium lead halide perovskite nanocrystals for photodetector applications. *Chem. Commun.* **52**(10), 2067-2070 (2016). <https://doi.org/10.1039/C5CC08643D>
- [5] X.S. Zhang, Q. Wang, Z.W. Jin, J.R. Zhang, S.F. Liu, Stable ultra-fast broad-bandwidth photodetectors based on  $\alpha$ -CsPbI<sub>3</sub> perovskite and NaYF<sub>4</sub>:Yb,Er quantum dots. *Nanoscale* **9**(19), 6278-6285 (2017). <https://doi.org/10.1039/c7nr02010d>
- [6] X. Tang, Z. Zu, H. Shao, W. Hu, M. Zhou et al., All-inorganic perovskite CsPb(Br/I)<sub>3</sub> nanorods for optoelectronic application. *Nanoscale* **8**(33), 15158-15161 (2016). <https://doi.org/10.1039/c6nr01828a>
